# Supplementary material for: Diabetes and Phacoemulsification Cataract Surgery: Difficulties, Risks and Potential Complications
Source: PubMed Central journal article supplement (PMC6572121; doi:10.3390/jcm8050716), 2019-05-20
Supplement: jcm-08-00716-s001.pdf [file jcm-08-00716-s001.pdf]

## **Supplement 1. Search strategy**

Literature searches of the PubMed and Web of Science databases were conducted in October 31, 2018; the search strategies are as follows. Specific limited update searches were conducted after October 31, 2018. Reference lists of the included studies were also considered as a source of publications.

### **A.1. PubMed Search (Publication Date 1/10/11–10/31/2018)**

((“diabetes”[Title]) OR (“diabetic”[Title])) AND ((“cataract surgery”[Title]) OR (“phacoemulsification”[Title])).  
147 references.

### **A.2. Web Of Science Search (Publication Date 1/10/11–10/31/2018)**

(TI=(diabetes) OR TI=(diabetic)) AND (TI=(cataract surgery) OR TI=(phacoemulsification))  
Indexes=SCI-EXPANDED, SSCI, A&HCI, CPCI-S, CPCI-SSH, BKCI-S, BKCI-SSH, ESCI, CCR-  
EXPANDED, IC Timespan=All years  
333 references.
